# Supplementary material
Source: publisher figshare collection journal article supplement (https://aacr.figshare.com/ndownloader/files/39918480)
Supplement: Supplementary file 1 [file 39918480]

**Radiomics Feature Extraction**

Since the intensity values of MR images distribute widely, we used z-score normalization to make the image intensities have the properties of a standard normal distribution with and , where is the mean value of the images, and is the standard deviation. The normalized values (also called z scores) of the image intensities (*x*) were calculated as follows:

After z-score normalization of image pixel intensities, a total of 563 quantitative imaging features including 4 statistical features, 43 voxel-intensity computational features and 516 wavelet features, were extracted respectively for T2 images and ADC maps of each scan using corresponding ROIs.

**(1) Statistical features**

The following 4 statistical features were extracted from the ROI of each patient’s T2 images and ADC maps for each scan: IntensityMax, IntensityMin, IntensityAve, IntensityStd, IntensityVar, Skewness, and Kurtosis. IntensityMax, IntensityMin, IntensityAve, and IntensityStd were the maximum, minimum, average, and standard deviation intensity value of the ROI, respectively.

Let VI(i,j,k) be the intensity of the ROI.

1. **IntensityMax:** The maximum intensity value of **VI.**
2. **IntensityMin:** The minimum intensity value of **VI**.
3. **IntensityAve:** The average intensity value of **VI**.
4. **IntensityStd:**

**(2)** **Voxel-intensity computational features**

Forty-three voxel-intensity computational based features including the first order statistic texture features, second order statistic texture features, and higher order statistic texture features were extracted. Three first order statistic texture features including: Variance, Skewness, and Kurtosis were extracted to describe the intensity histogram distribution of the tumor region. Nine second order statistic texture features could be calculated from the Gray Level Co-occurrence Matrix (GLCM). Thirty-one high order statistic texture features were calculated from the Gray Level Size Zone Matrix (GLSZM), Gray Level Run Length Matrix (GLRLM), and Neighborhood Gray Tone Difference Matrix (NGTDM). All of the GLCM, GLSZM, GLRLM, and NGTDM based texture feature were calculated using a 2D analysis and then averaged for all slices within the three-dimensional tumor volume.

*First-order statistical features*

First-order statistical features described the distribution of voxel intensities of the tumor region. Let **P** represent the 3-D image histogram distribution. The following first-order statistical features were extracted:

1. **Variance:**

1. **Skewness:**

1. **Kurtosis:**

*Gray-Level Co-Occurrence Matrix based features (GLCM)*

GLCM based features were second-order statistical texture features, which are defined as a matrix *M*(*i, j; δ, θ*) to indicate the relative frequency with intensity values of pixels (*i* and *j*) at the distance of *δ* in direction *θ*.

Let:

*M*(*i, j*) be the co-occurrence matrix for an arbitrary *δ* and *θ*,

*Ng* be the number of discrete intensity levels in the images,

*μ* be the mean of *M*(*i, j*),

be the marginal row probabilities,

be the marginal column probabilities, and

*μx* be the mean of *mx*.

1. **Energy:**

1. **Contrast:**

1. **Entropy:**

1. **Homogeneity I:**

1. **Correlation:**

1. **Variance:**

1. **Sum Average:**

1. **Dissimilarity:**

1. **Inverse Difference Moment:**

*Gray Level Run Length Matrix based features (GLRLM)*

GLRLM based features were high-order statistical texture feature, which were defined as *P*(*i, j; θ*) to indicate the number of times j and gray level i appear consecutively in the direction *θ*.

Let:

*P*(*i, j; θ*) be the run-length matrix *P* for a direction *θ*,

*Ng* be the number of discrete intensity values,

*Nr* be the number of different run lengths, and

*Np* be the number of voxels in the ROI.

1. **Short Run Emphasis (SRE):**

1. **Long Run Emphasis (LRE):**

1. **Gray-Level Nonuniformity (GLN):**

1. **Run-Length Nonuniformity (RLN):**

1. **Run Percentage (RP):**

1. **Low Gray-Level Run Emphasis (LGRE):**

1. **High Gray-Level Run Emphasis (HGRE):**

1. **Short Run Low Gray-Level Emphasis (SRLGE):**

1. **Short Run High Gray-Level Emphasis (SRHGE):**

1. **Long Run Low Gray-Level Emphasis (LRLGE):**

1. **Long Run High Gray-Level Emphasis (LRHGE):**

1. **Gray-Level Variance (GLV):**

1. **Run-Length Variance (RLV):**

*Gray Level Size Zone Matrix based features (GLSZM)*

GLSZM based features were high-order statistical texture features, which were defined as *P*(*i, j*) to indicate the areas of size j and gray level i.

Let:

*P*(*i, j*) be the size zone of matrix *P*,

*Ng* be the number of discrete intensity values,

*Nr* be the number of different areas sizes,

*Np* be the number of voxels in the ROI.

1. **Small Zone Emphasis (SZE):**

1. **Large Zone Emphasis (LZE):**

1. **Gray-Level Nonuniformity (GLN):**

1. **Zone-Size Nonuniformity (ZSN):**

1. **Zone Percentage (ZP):**

1. **Low Gray-Level Zone Emphasis (LGZE):**

1. **High Gray-Level Zone Emphasis (HGZE):**

1. **Small Zone Low Gray-Level Emphasis (SZLGE):**

1. **Small Zone High Gray-Level Emphasis (SZHGE):**

1. **Large Zone Low Gray-Level Emphasis (LZLGE):**

1. **Large Zone High Gray-Level Emphasis (LZHGE):**

1. **Gray-Level Variance (GLV):**

1. **Zone-Size Variance (ZSV):**

*Neighborhood Gray Tone Difference Matrix based features (NGTDM)*

NGTDM based features were high-order statistical texture features, which were defined as *S(i)* to indicate the sum of the absolute value between gray intensity level i and it’s neighbors’ average intensity.

Let:

*S(i)* be the sum of absolute value between gray intensity level i and its neighbors’ average intensity,

*C(i)* be the number of voxels with the gray intensity level I,

*Ng* be the number of discrete intensity values.

1. **Coarseness:**

1. **Contrast:**

1. **Busyness:**

1. **Complexity:**

1. **Strength:**

**(3) Wavelet features: first order statistical, second order statistical, and high order statistical texture of a wavelet filtered image.**

A total of 516 wavelet based features were extracted. By using the Gabor-bank wavelet, we obtained four different scales and eight different orientations filtered images. These wavelet-based features were computed on the filtered images. The original image was filtered by a two-dimensional Gabor filter defined as:

In this study, four frequency scales and eight orientations were used. After filtering, 32 filtered images were detected. For each frequency scale, the filtered images of 8 different orientations were summed, and then four new images were generated. For each orientation, the filtered images of 4 different scales were summed, and then 8 new images were generated. After these operations, 12 filtered images were generated. For each image, the first order statistical, second order statistical, and high order statistical texture features were computed.

**Radiomics score calculation formula:**

Radiomics score = -1.3794 + 0.1095 × Pre-T2WI_GLSZM_Zone-Size Variance_ D_7

+ 0.2224 × Pre-ADC_GLSZM_Low Gray-Level Zone Emphasis

- 0.1091 × Pre-ADC_GLSZM_Large Zone Emphasis_F_2

- 0.2063 × Pre-ADC_GLSZM_Large Zone High Gray-Level Emphasis_F_2

- 0.2509 × Pre-ADC_GLRLM_Long Run High Gray-Level Emphasis_D_2

- 0.2182 × Pre-ADC_Variance_D_3

+ 0.1207 × Pre-ADC_GLRLM _Run-Length Nonuniformity_D_3

- 0.1801 × Pre-ADC_NGTDM_Contrast_D_7

- 0.0633 × Pre-ADC_GLCM_Correlation_D_8

+ 0.2858 × Pre-ADC_GLSZM_Zone-Size Nonuniformity_D_8

+ 0.0563 × Pre-ADC_GLSZM_Gray-Level Variance_D_8

- 0.0806 × Post-ADC_GLCM_Contrast

- 0.1270 × Post-ADC_NGTDM_Complexity

+ 0.2021 × Post-ADC_NGTDM_Contrast_F_1

+ 0.1263 × Post-ADC_GLRLM_Low Gray-Level Run Emphasis_F_3

+ 0.1313 × Post-ADC_GLRLM_Short Run Low Gray-Level Emphasis_F_3

+ 0.2385 × Post-ADC_NGTDM_Contrast_F_4

- 0.1609 × Post-ADC_GLCM_Correlation_D_1

- 0.1983 × Post-ADC_GLCM_Correlation_D_2

+ 0.0463 × Post-ADC_GLRLM_Run-Length Nonuniformity_D_2

+ 0.1797 × Post-ADC_GLRLM_Short Run Low Gray-Level Emphasis_D_2

- 0.0833 × Post-ADC_GLCM_Correlation_D_3

+ 0.1528 × Post-ADC_GLSZM_Small Zone Emphasis_D_3

- 0.2302 × Post-ADC_NGTDM_Coarseness_D_3

- 0.1311 × Post-ADC_GLCM_Homogeneity I_D_5

- 0.1357 × Post-ADC_GLCM_Variance_D_5

+ 0.0016 × Post-ADC_GLSZM_Small Zone Low Gray-Level Emphasis_D_5

- 0.1317 × Post-ADC_NGTDM_Busyness_D_5

- 0.3125 × Post-ADC_GLCM _Correlation_D_6

+ 0.0822 × Post-ADC_GLSZM_Zone-Size Nonuniformity_D_7

Table S1. Demographic comparison between Primary and Validation cohorts

| Characteristic | Primary Set | Validation Set | P |
| --- | --- | --- | --- |
| Age, mean ± SD, years | 56.66±9.695 | 58.97±10.460 | 0.110 |
| Gender (%) |  |  | 0.075 |
| Male | 88(57.89%) | 50(71.43%) |  |
| Female | 64(42.11%) | 20(28.57%) |  |
| Post-treatment CEA (%) |  |  | 0.861 |
| Normal | 134(88.16%) | 63(90%) |  |
| Abnormal | 18(11.84%) | 7(10%) |  |
| Post-treatment CA199 (%) |  |  | 0.856 |
| Normal | 143(94.08%) | 67(95.71%) |  |
| Abnormal | 9(5.92%) | 3(4.29%) |  |
| Histologic grade (%) |  |  | 0.066 |
| I | 0(0%) | 2(2.86%) |  |
| II | 135(88.82%) | 56(80%) |  |
| III | 12(7.89%) | 6(8.57%) |  |
| IV | 5(3.29%) | 5(7.14%) |  |
| V | 0(0%) | 1(1.43%) |  |
| Pre-treatment T stage (%) |  |  | 0.843 |
| T0 | 0(0%) | 0(0%) |  |
| T1 | 0(0%) | 0(0%) |  |
| T2 | 21(13.82%) | 10(14.29%) |  |
| T3 | 115(75.66%) | 55(78.57%) |  |
| T4a | 7(4.61%) | 3(4.29%) |  |
| T4b | 9(5.92%) | 2(2.86%) |  |
| Pre-treatment N stage (%) |  |  | 0.020* |
| N0 | 11(7.24%) | 3(4.29%) |  |
| N1a | 7(4.61%) | 7(10%) |  |
| N1b | 33(21.71%) | 6(8.57%) |  |
| N2a | 38(25%) | 13(18.57%) |  |
| N2b | 63(41.45%) | 41(58.57%) |  |
| Post-treatment T stage (%) |  |  | 0.954 |
| T0 | 31(20.39%) | 13(18.57%) |  |
| T1 | 7(4.61%) | 4(5.71%) |  |
| T2 | 54(35.53%) | 23(32.86%) |  |
| T3 | 58(38.16%) | 30(42.86%) |  |
| T4a | 1(0.66%) | 0(0%) |  |
| T4b | 1(0.66%) | 0(0%) |  |
| Post-treatment N stage (%) |  |  | 0.221 |
| N0 | 112(73.68%) | 49(70%) |  |
| N1a | 23(15.13%) | 7(10%) |  |
| N1b | 11(7.24%) | 8(11.43%) |  |
| N2a | 3(1.97%) | 5(7.14%) |  |
| N2b | 3(1.97%) | 1(1.43%) |  |
| Radiomics Score  (mean ± SD) | 0.2025±0.2725 | 0.1868±0.2746 | 0.691 |
| Post-treatment TL | 29.47±10.167 | 26.46±9.015 | 0.035* |
| Post-treatment TTOA | 9.51±3.220 | 9.20±3.215 | 0.510 |
| Post-treatment IDBMP | 2.11±3.042 | 2.53±3.602 | 0.372 |
| Post-treatment SDBMT | 5.74±4.828 | 6.96±6.263 | 0.114 |
| Post-treatment NLN | 7.61±3.893 | 6.93±3.338 | 0.206 |
| Post-treatment MALLLN | 4.25±2.994 | 4.03±2.377 | 0.582 |
| Pre-treatment TL | 45.16±14.075 | 44.90±13.307 | 0.895 |
| Pre-treatment TTOA | 15.51±4.986 | 16.97±5.313 | 0.049 |
| Pre-treatment IDBMP | 4.82±4.233 | 5.91±6.471 | 0.135 |
| Pre-treatment SDBMT | 4.35±4.308 | 4.50±5.447 | 0.824 |
| Pre-treatment NLN | 12.44±5.779 | 12.10±4.993 | 0.671 |
| Pre-treatment MALLLN | 6.47±3.400 | 6.76±3.437 | 0.557 |

*Note*: *Chi-Square or Fisher Exact tests, as appropriate, were used to compare the differences in categorical variables* (Gender, Post-treatment CEA, Post-treatment CA19-9, Histologic grade, Pre- and Post-treatment T stage, and Pre- and Post-treatment N stage), while a two-sample t-test was used to compare the differences in age, Radiomics Score, Pre-and Post-treatment TL, TTOA, IDBMP, SDBMT, NLN and MALLLN. Laboratory analysis of CEA and CA 19-9 were done via routine blood tests within 1 week before surgery. The threshold value for CEA level was ≤5 ng/mL and > 5 ng/mL and the threshold value for CA 19-9 level was ≤39 U/mL and > 39 U/mL, according to the normal range used in clinics.

*Abbreviations*: *pCR*, pathological complete response; CEA, carcinoembryonic antigen; CA19-9, carbohydrate antigen 19-9; SD, standard deviation; ADC, apparent diffusion coefficient.Tumor’s length, TL; Tumor’s thickness obtained from oblique axial T2WI, TTOA; The invasion distance beyond the muscularis propria, IDBMP; The shortest distance between the mesorectal fascia and the outer edge of the tumor extension, SDBMT; Total number of the lymph nodes detected by DWI, NLN; The minor axis length of the largest lymph node, MALLLN.

** P < 0.05*

Table S2. Radiomics features associated with CRT outcome identified by two sample t-test and LASSO

| Radiomics Feature | Coefficient in SVM model | Sequence | MRI scan | Normalized values  (mean ± standard deviation) | | *P value* |
| --- | --- | --- | --- | --- | --- | --- |
| *pCR* cohort | *non-pCR* cohort |
| GLSZM_Zone-Size Variance_ D_7 | 0.1095 | T2WI | Pre-treatment | 0.5768±1.8339 | -0.1264±0.6660 | *< 0.01* |
| GLSZM_Low Gray-Level Zone Emphasis | 0.2224 | ADC | Pre-treatment | 0.7196±1.2765 | -0.1412±0.8668 | *< 0.01* |
| GLSZM_Large Zone Emphasis_F_2 | -0.1091 | ADC | Pre-treatment | -0.7111±0.4653 | 0.1503±1.0222 | *< 0.01* |
| GLSZM_Large Zone High Gray-Level Emphasis_F_2 | -0.2063 | ADC | Pre-treatment | -0.6974±0.4481 | 0.1459±1.027 | *< 0.01* |
| GLRLM_Long Run High Gray-Level Emphasis_D_2 | -0.2509 | ADC | Pre-treatment | -0.6209±1.1059 | 0.1366±0.9272 | *< 0.01* |
| Variance_D_3 | -0.2182 | ADC | Pre-treatment | 0.9106±1.0647 | -0.1881±0.8845 | *< 0.01* |
| GLRLM _Run-Length Nonuniformity_D_3 | 0.1207 | ADC | Pre-treatment | 0.9996±1.0019 | -0.2100±0.8726 | *< 0.01* |
| NGTDM_Contrast_D_7 | -0.1801 | ADC | Pre-treatment | 0.8620±1.4972 | -0.1730±0.7592 | *< 0.01* |
| GLCM_Correlation_D_8 | -0.0633 | ADC | Pre-treatment | -0.7257±1.3332 | 0.1635±0.8298 | *< 0.01* |
| GLSZM_Zone-Size Nonuniformity_D_8 | 0.2858 | ADC | Pre-treatment | 0.9005±1.0881 | -0.1720±0.8632 | *< 0.01* |
| GLSZM_Gray-Level Variance_D_8 | 0.0563 | ADC | Pre-treatment | 0.9307±1.9371 | -0.1927±0.4926 | *< 0.01* |
| GLCM_Contrast | -0.0806 | ADC | Post-treatment | -0.8655±1.0841 | 0.1834±0.8875 | *< 0.01* |
| NGTDM_Complexity | -0.1270 | ADC | Post-treatment | -1.3298±0.7999 | 0.2846±0.7888 | *< 0.01* |
| NGTDM_Contrast_F_1 | 0.2021 | ADC | Post-treatment | 1.0461±2.0003 | -0.2190±0.3641 | *< 0.01* |
| GLRLM_Low Gray-Level Run Emphasis_F_3 | 0.1263 | ADC | Post-treatment | 0.8703±1.6073 | -0.1802±0.7115 | *< 0.01* |
| GLRLM_Short Run Low Gray-Level Emphasis_F_3 | 0.1313 | ADC | Post-treatment | 0.9827±1.5547 | -0.2051±0.6973 | *< 0.01* |
| NGTDM_Contrast_F_4 | 0.2385 | ADC | Post-treatment | 0.8860±1.5940 | -0.1844±0.7122 | *< 0.01* |
| GLCM_Correlation_D_1 | -0.1609 | ADC | Post-treatment | -1.1948±1.3706 | 0.2676±0.6244 | *< 0.01* |
| GLCM_Correlation_D_2 | -0.1983 | ADC | Post-treatment | -1.1662±1.4720 | 0.2574±0.6171 | *< 0.01* |
| GLRLM_Run-Length Nonuniformity_D_2 | 0.0463 | ADC | Post-treatment | 1.2304±0.8765 | -0.2670±0.8041 | *< 0.01* |
| GLRLM_Short Run Low Gray-Level Emphasis_D_2 | 0.1797 | ADC | Post-treatment | 0.8819±1.7182 | -0.1756±0.6491 | *< 0.01* |
| GLCM_Correlation_D_3 | -0.0833 | ADC | Post-treatment | -1.1706±1.3348 | 0.2600±0.6666 | *< 0.01* |
| GLSZM_Small Zone Emphasis_D_3 | 0.1528 | ADC | Post-treatment | 1.3107±1.1372 | -0.2744±0.7226 | *< 0.01* |
| NGTDM_Coarseness_D_3 | -0.2302 | ADC | Post-treatment | 0.9824±1.4765 | -0.2140±0.7130 | *< 0.01* |
| GLCM_Homogeneity I_D_5 | -0.1311 | ADC | Post-treatment | -0.6421±1.1581 | 0.1270±0.9164 | *< 0.01* |
| GLCM_Variance_D_5 | -0.1357 | ADC | Post-treatment | -0.8831±1.5609 | 0.1866±0.7251 | *< 0.01* |
| GLSZM_Small Zone Low Gray-Level Emphasis_D_5 | 0.0016 | ADC | Post-treatment | 0.8809±1.6194 | -0.1823±0.7027 | *< 0.01* |
| NGTDM_Busyness_D_5 | -0.1317 | ADC | Post-treatment | 0.8186±1.7819 | -0.1779±0.6253 | *< 0.01* |
| GLCM _Correlation_D_6 | -0.3125 | ADC | Post-treatment | -0.9110±1.4758 | 0.2100±0.6881 | *< 0.01* |
| GLSZM_Zone-Size Nonuniformity_D_7 | 0.0822 | ADC | Post-treatment | 1.2310±1.3325 | -0.2623±0.6809 | *< 0.01* |

*Abbreviations*: ADC, apparent diffusion coefficient; T2WI, T2-weighted images; GLCM, gray-level co-occurrence matrix; GLRLM, gray level run length matrix; GLSZM, gray level size zone matrix; NGTDM, neighborhood gray tone difference matrix; D, wavelet features with Gabor filter using eight orientations; F, wavelet features with Gabor filter using four frequency scales.

Table S3. Related factors for *pCR* detection in LARC

| Intercept and Variable | *β* | Odds ratio(95% CI) | P |
| --- | --- | --- | --- |
| Intercept | -9.998 | -- | -- |
| Radiomics Signature | 14.567 | 1.203e+06 (1.061e+05，4.234e+07) | <0.001* |
| Post-treatment Tumor Length | 0.126 | 1.1344 (1.0825，1.1889) | 0.008* |

*Note*: *β* is the regression coefficient. **P ＜ 0.05.*

Table S4. Statistical significance of the clinical information in the multivariate regression model.

| Variable | P value | *β* |
| --- | --- | --- |
| Gender | 0.2205 | 2.89698040 |
| Age | 0.1495 | -0.16060292 |
| Post-treatment CEA | 0.9956 | -5.48738272 |
| Post-treatment CA199 | 0.5144 | 2.40632498 |
| Histologic grade | 0.4148 | 1.54878800 |
| Pre-treatment Tumor Length | 0.8516 | -0.01930477 |
| Pre-treatment tumor thickness obtained from oblique axial T2WI | 0.4199 | -0.22358737 |
| Post-treatment tumor thickness obtained from oblique axial T2WI | 0.2498 | 0.48438121 |
| Pre-treatment The invasion distance beyond the muscularis propria | 0.1891 | 0.59037530 |
| Post-treatment The invasion distance beyond the muscularis propria | 0.1742 | -0.97113814 |
| The shortest pre-treatment distance between the mesorectal fascia and the outer edge of the tumor extension | 0.2097 | 0.32502116 |
| The shortest post-treatment distance between the mesorectal fascia and the outer edge of the tumor extension | 0.2303 | -0.33116996 |
| Total number of the lymph nodes detected by pre-treatment DWI | 0.3460 | 0.25430642 |
| Total number of the lymph nodes detected by post-treatment DWI | 0.9929 | -0.00246772 |
| The minor axis length of the pre-treatment largest lymph node | 0.2395 | -0.27991062 |
| The minor axis length of the post-treatment largest lymph node | 0.7631 | -0.11267455 |

**Figure S1. Recruitment pathway for patients in this study.**

**Figure S2. Typical cases of *pCR* and *non-pCR*.**

**
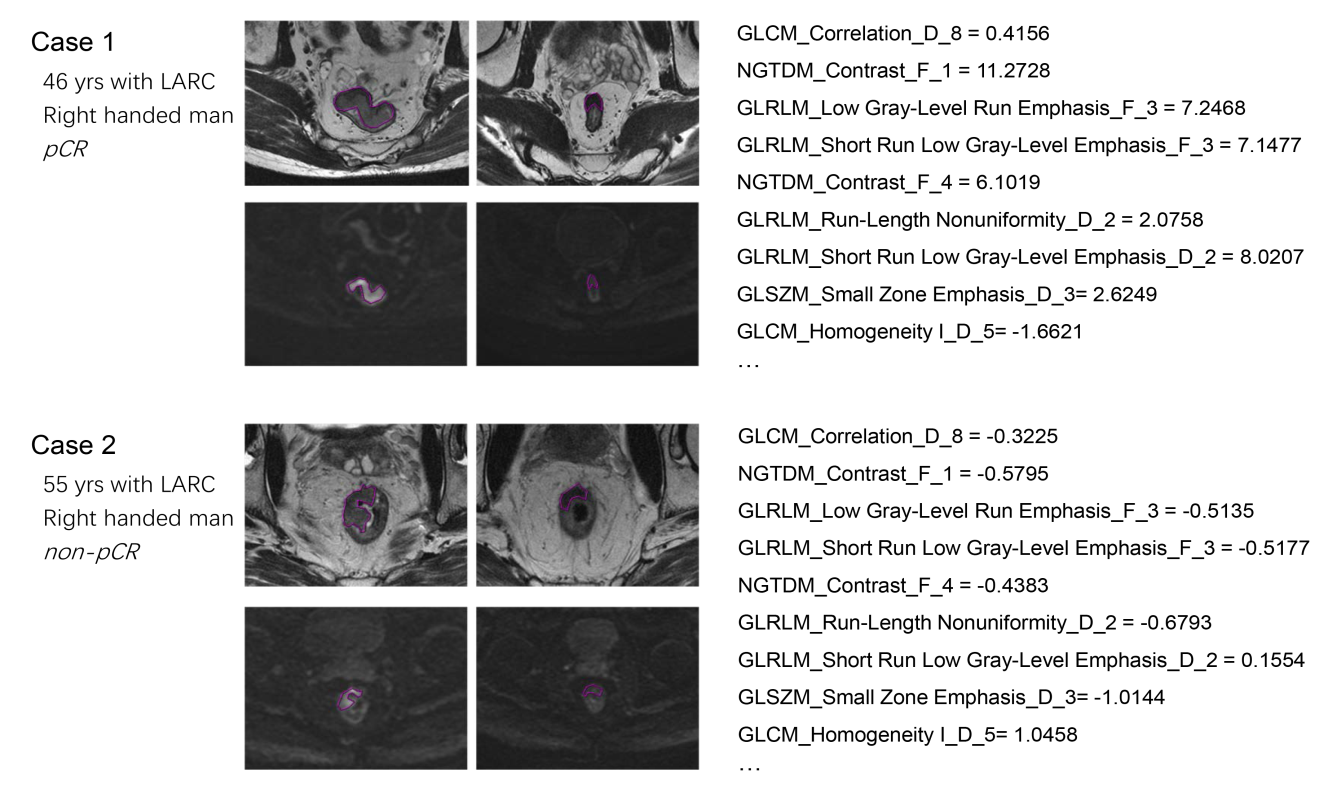
**
